# Supplementary material for: Notoginsenoside Fe suppresses diet induced obesity and activates paraventricular hypothalamic neurons
Source: Royal Society of Chemistry journal article supplement (doi:10.1039/c8ra07842d), 2019-01-01

**Supplementary Fig. S1** *I.p* injection with notoginsenoside Fe have no effect on body weight and feeding in chow mice. (A) Body weight. (B) Food intake. (C-D) C-Fos expression in ARC. (E-F) C-Fos expression in PVH.

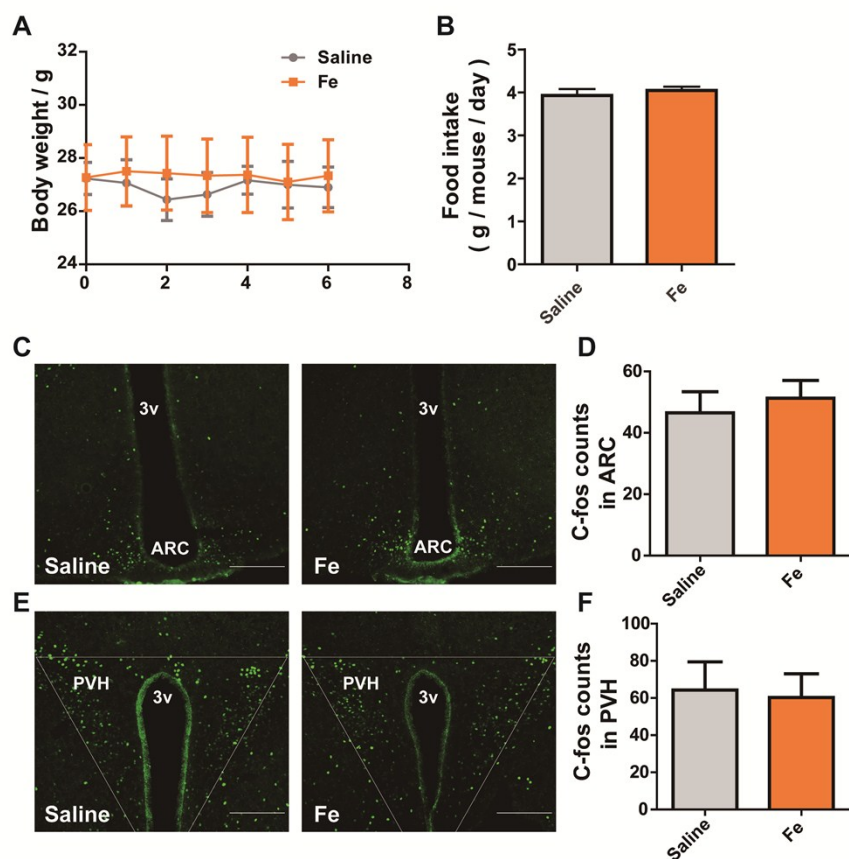

Supplement: c8ra07842d1.pdf [file c8ra07842d1.pdf]
